# Supplementary material for: Stabilization of pentazolate anions in the high-pressure compounds Na2N5and NaN5and in the sodium pentazolate framework NaN5·N2
Source: Royal Society of Chemistry journal article supplement (doi:10.1039/d1dt00722j), 2021-01-01
Supplement: d1dt00722j1.pdf [file d1dt00722j1.pdf]

### Supplementary information

**Table S1.** Summary of the synthetic conditions

| Sample | Reagents                          | Pressure, GPa | T, K       | Products                                                                               |
|--------|-----------------------------------|---------------|------------|----------------------------------------------------------------------------------------|
| 1      | NaN <sub>3</sub>                  | 50(3)*        | 1800(200)  | Na <sub>2</sub> N <sub>5</sub>                                                         |
| 2      | NaN <sub>3</sub> + N <sub>2</sub> | 52(1)         | 2200 (200) | Na <sub>2</sub> N <sub>5</sub><br>NaN <sub>5</sub><br>NaN <sub>5</sub> ·N <sub>2</sub> |
| 2      | NaN <sub>3</sub> + N <sub>2</sub> | 34 (1)        | < 1000     | Na <sub>3</sub> N <sub>8</sub>                                                         |
| 2      | NaN <sub>3</sub> + N <sub>2</sub> | 14 (1)        | < 1000     | NaN <sub>2</sub>                                                                       |

\* non-hydrostatic conditions due to the absence of pressure-transmitting medium

**Table S2**

| <b>Crystal data</b>                                                        |                                                                                |                               |                                |                                 |
|----------------------------------------------------------------------------|--------------------------------------------------------------------------------|-------------------------------|--------------------------------|---------------------------------|
| Chemical formula                                                           | NaN <sub>5</sub> ·N <sub>2</sub>                                               | NaN <sub>5</sub>              | Na <sub>3</sub> N <sub>8</sub> | Na <sub>2</sub> N <sub>5</sub>  |
| $M_r$                                                                      | 121.06                                                                         | 93.04                         | 181.05                         | 116.03                          |
| Crystal system, space group                                                | Monoclinic, $P2_1/n$                                                           | Orthorhombic, $Pmn2_1$        | Tetragonal, $I4_1/amd$         | Monoclinic, $Pm$                |
| Pressure (GPa)                                                             | 52.9                                                                           | 52.9                          | 32.4                           | 50.0                            |
| $a, b, c$ (Å)                                                              | 10.321(3), 8.672(3), 11.0409(17)                                               | 5.455(6), 2.836(12), 5.662(8) | 4.8538(9), 16.037(10)          | 4.781(10), 2.5873(7), 4.934(12) |
| $\beta$ (°)                                                                | 91.70(2)                                                                       |                               |                                | 119.6(3)                        |
| $V$ (Å <sup>3</sup> )                                                      | 987.8(5)                                                                       | 87.6(4)                       | 377.8(3)                       | 53.1(2)                         |
| $Z$                                                                        | 16                                                                             | 2                             | 4                              | 1                               |
| Radiation type                                                             | Synchrotron, $\lambda = 0.29521$ Å                                             |                               |                                |                                 |
| $\mu$ (mm <sup>-1</sup> )                                                  | 0.08                                                                           | 0.09                          | 0.09                           | 0.10                            |
| <b>Data collection</b>                                                     |                                                                                |                               |                                |                                 |
| Diffractometer                                                             | 13IDD @ APS                                                                    |                               |                                |                                 |
| Absorption correction                                                      | Multi-scan <i>Crys.Alis PRO</i> 1.171.40.75a (Rigaku Oxford Diffraction, 2020) |                               |                                |                                 |
| $T_{\min}, T_{\max}$                                                       | 0.703, 1.000                                                                   | 0.465, 1.000                  | 0.220, 1.000                   | 0.598, 1.000                    |
| No. of measured, independent and observed [ $I > 2\sigma(I)$ ] reflections | 2419, 1474, 811                                                                | 169, 133, 130                 | 442, 164, 111                  | 135, 115, 93                    |
| $R_{\text{int}}$                                                           | 0.055                                                                          | 0.045                         | 0.053                          | 0.014                           |
| $(\sin \theta/\lambda)_{\text{max}}$ (Å <sup>-1</sup> )                    | 0.894                                                                          | 0.887                         | 0.859                          | 0.853                           |
| <b>Refinement</b>                                                          |                                                                                |                               |                                |                                 |
| $R[F^2 > 2\sigma(F^2)], wR(F^2), S$                                        | 0.079, 0.242, 0.99                                                             | 0.053, 0.148, 1.24            | 0.040, 0.092, 0.98             | 0.057, 0.140, 1.11              |
| No. of reflections                                                         | 1474                                                                           | 133                           | 164                            | 115                             |
| No. of parameters                                                          | 129                                                                            | 18                            | 18                             | 23                              |
| No. of restraints                                                          | 8                                                                              |                               |                                | 2                               |
| $\Delta\rho_{\text{max}}, \Delta\rho_{\text{min}}$ (e Å <sup>-3</sup> )    | 0.70, -0.45                                                                    | 0.47, -0.60                   | 0.32, -0.31                    | 0.62, -0.40                     |

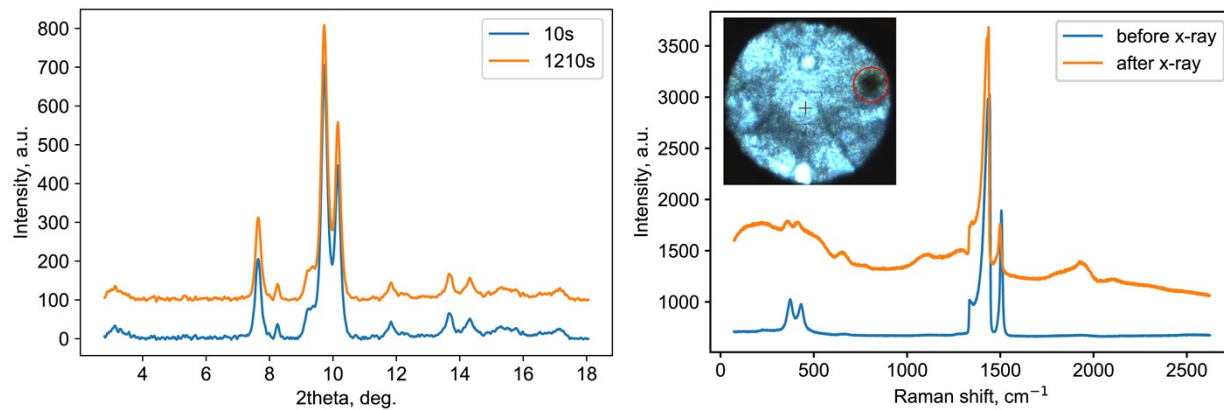

**Figure S1.** X-ray diffraction pattern of  $\text{NaN}_3$  exposed to 37 keV X-ray radiation during 10 and 1210 s and corresponding Raman spectra. Raman spectrum of  $\text{NaN}_3$  after X-ray exposure corresponds very well with the Raman spectrum of cold-compressed  $\text{NaN}_3$  reported by Eremets et al. [1]. This phase was called  $\text{NaN}_3$  phase II. The appearance of new bands around 1750-2000, 1100 and 1300  $\text{cm}^{-1}$  suggests that new N-N bonds may form as a result of the interaction between  $\text{N}_3$  units. However, no noticeable changes could be observed in the diffraction pattern, suggesting that the X-ray induced high-pressure phase of  $\text{NaN}_3$  is amorphous in nature.

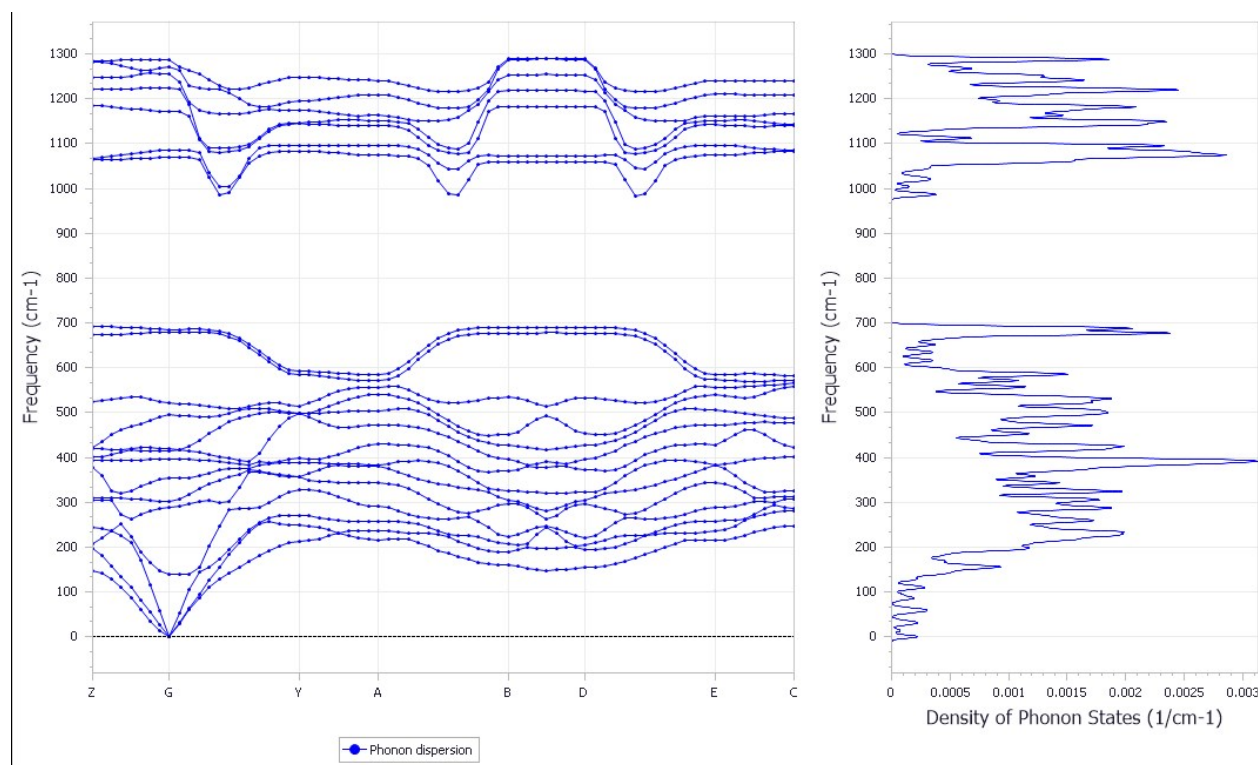

**Figure S2.** Calculated phonon dispersion curves and density of phonon states of  $\text{Na}_2\text{N}_5$  at  $\sim 50$  GPa.

**Procedure for the analysis of the multigrain single-crystal X-ray diffraction dataset collected in a diamond anvil cell:**

1. After the collection of a single-crystal X-ray diffraction dataset (series of  $\sim 120$  frames, collected with a step of  $\Delta\omega = 0.5^\circ$ ) we perform a standard peak search procedure as implemented by *CryAlis<sup>Pro</sup>* program.
2. We make a reconstruction of the peak search table in the reciprocal space (Figure S2a). The peak search table contains the peaks from all crystalline phases, which are present in the collection spot. These can be reaction products, initial reagents, pressure-transmitting medium, diamonds, gasket material, *etc.*
3. Inspecting the 3D reciprocal space (Figure S2a) in *CryAlisPro*, one finds reciprocal lattices of the well-diffracting phases (Figure S2b,c).

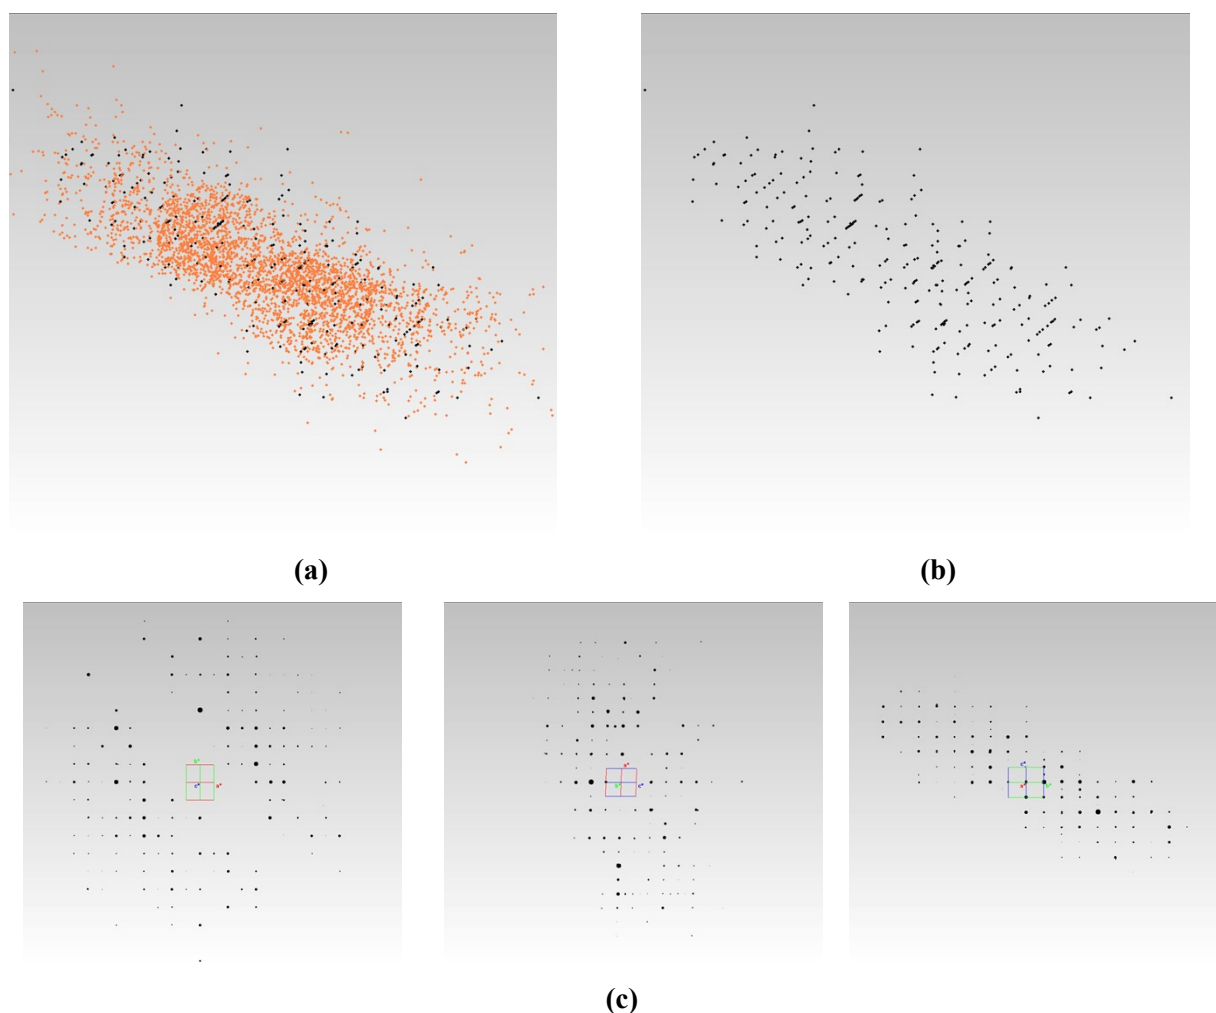

**Figure S3.** (a) The results of the peak search reconstruction in the reciprocal space. (b,c) The reciprocal lattice of  $\text{NaN}_7$  extracted from (a).

4. The quality of indexing is then checked on the reconstructions of the reciprocal lattice planes. In the Figure S4a we show the reconstruction of the plane ( $h3l$ ) as an example. First, we look if there are non-indexed peaks. In case they are present and form a regular pattern, it could mean that the found lattice parameters are incorrect (this is not the case in Figure S4a). Such a check is done for each accessible lattice plane. In our example, there are a few non-indexed peaks, which do not form a regular pattern. They may belong either to different grains of the same phase, or to different phases; this is clarified at the further steps of the analysis.

5. We perform the integration of the dataset using the orientation matrix for the found domain(s). The best indicator of the proper integration is a good value of  $R_{int}$  (5.5% in our dataset) and, of course, the possibility to solve and to refine the structure.

6. We try to find out if the lattice of the phase found first can describe all the reflections on the diffraction pattern. For that, we perform the 2D integration of the data to the “powder-like” Intensity vs  $2\Theta$  plot and make a Le-Bail fit (Figure S4c).

7. If we observe strong non-indexed peaks, we return to the step 3 in order to search for more phases.

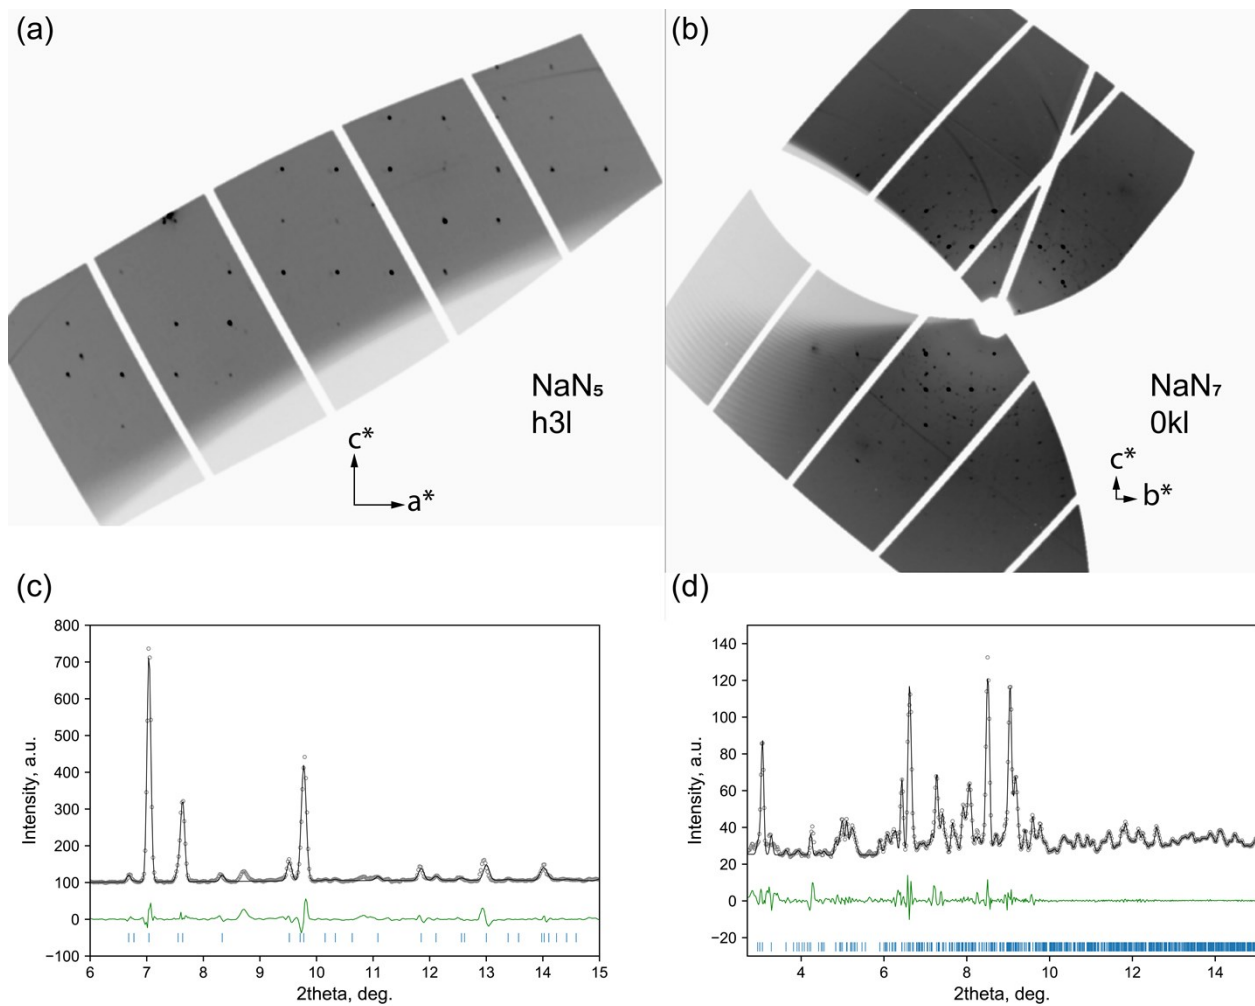

**Figure S4.** (a,b) Reconstruction of selected reciprocal lattice planes of  $\text{NaN}_5$  and  $\text{NaN}_7$ . (c,d) Le-Bail fits of  $\text{NaN}_5$  and  $\text{NaN}_7$  at  $\sim 53$  GPa respectively. Due to the large unit cell volume the peaks of  $\text{NaN}_7$  severely overlap already at low angles but are clearly resolved in single-crystal XRD. The Le-Bail fit of  $\text{NaN}_7$  is presented for demonstration purposes. Data extracted from this fit was not used in the paper.

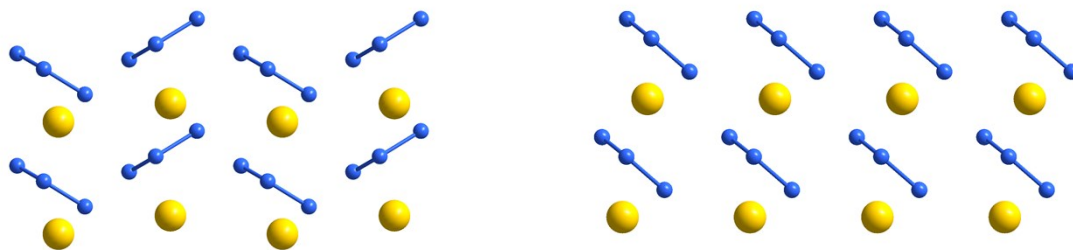

**Figure S5.** Comparison of experimental  $Pmn2_1$  (left) and theoretical  $Cm$  [2] models of  $\text{NaN}_5$  at  $\sim 50$  GPa.

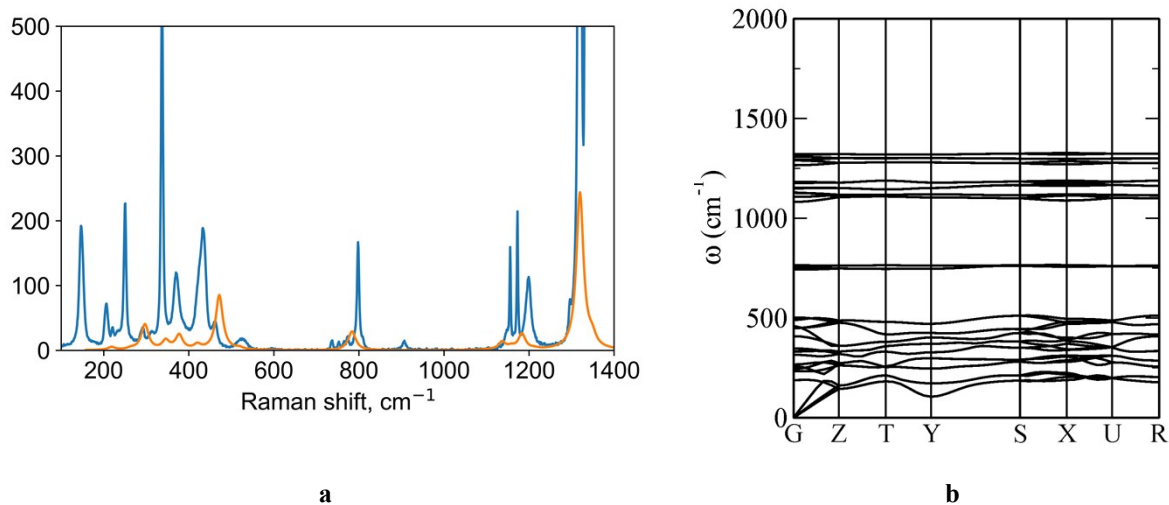

**Figure S6.** (a) Calculated (orange) and experimental Raman spectra of  $\text{NaN}_5$  at  $\sim 50$  GPa. It is known that calculations may give frequencies, which slightly deviate from the experimental results. To “calibrate” the calculated Raman spectra we added  $30 \text{ cm}^{-1}$  shift to all the peaks. (b) Calculated phonon dispersions for  $\text{NaN}_5$  at  $\sim 50$  GPa.

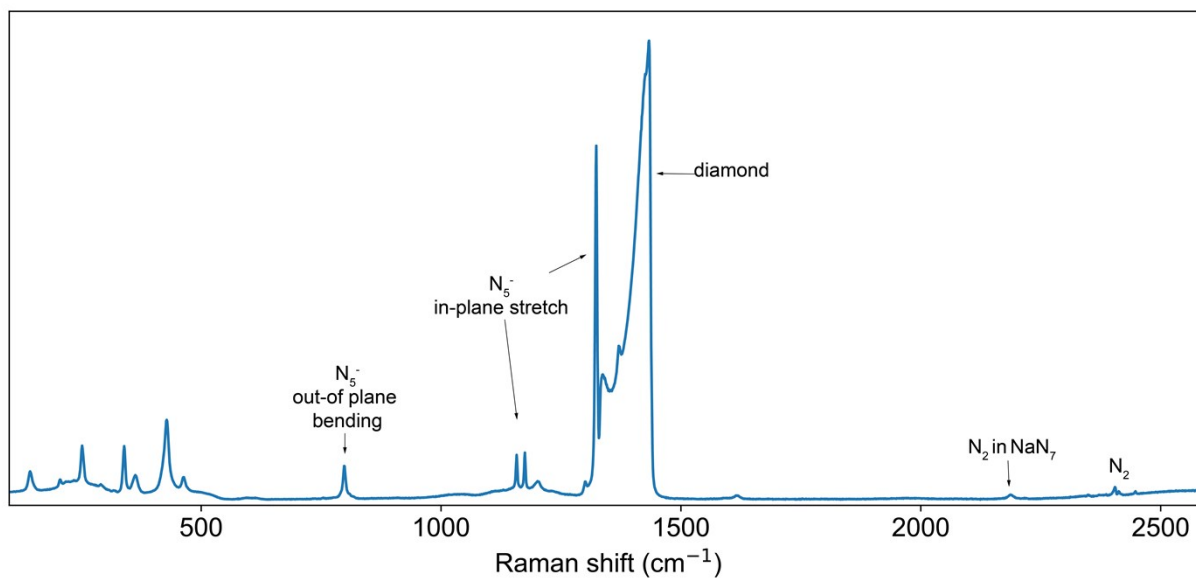

**Figure S7.** Raman spectra from a mixture of  $\text{NaN}_5$  and  $\text{NaN}_7$  phases at  $\sim 48$  GPa.

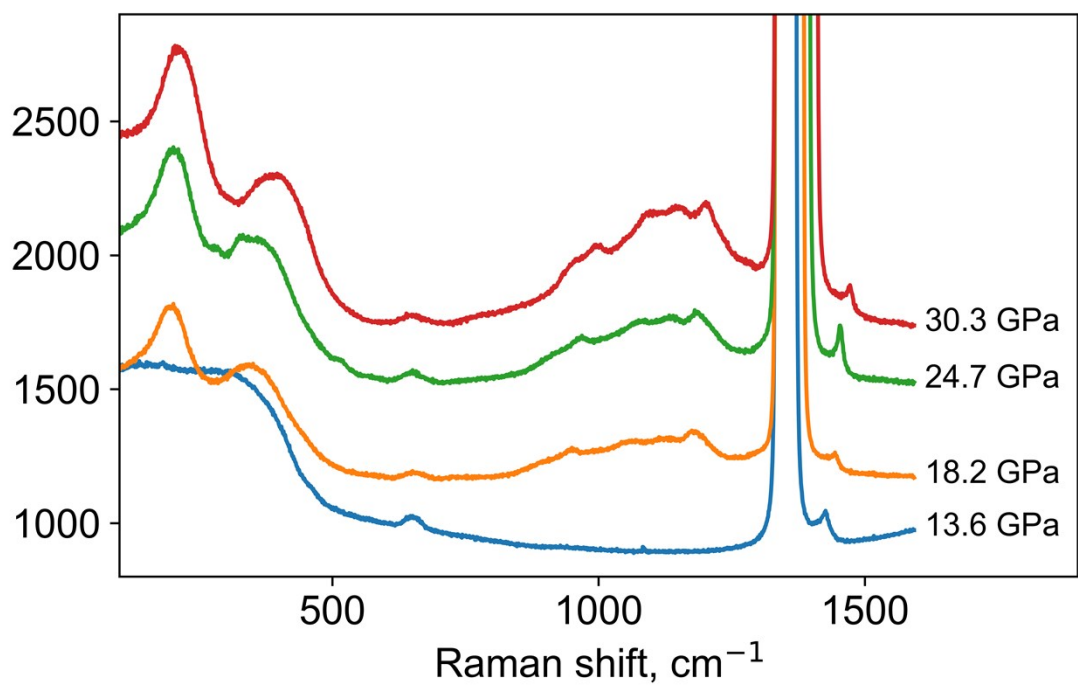

**Figure S8.** Raman spectra of Na<sub>2</sub>N<sub>5</sub> on decompression.

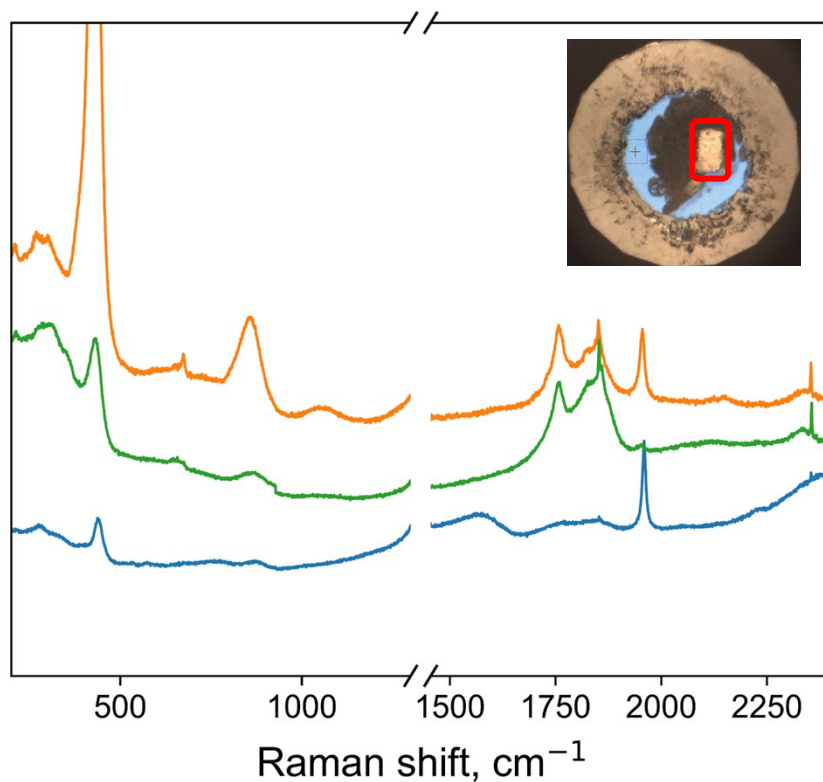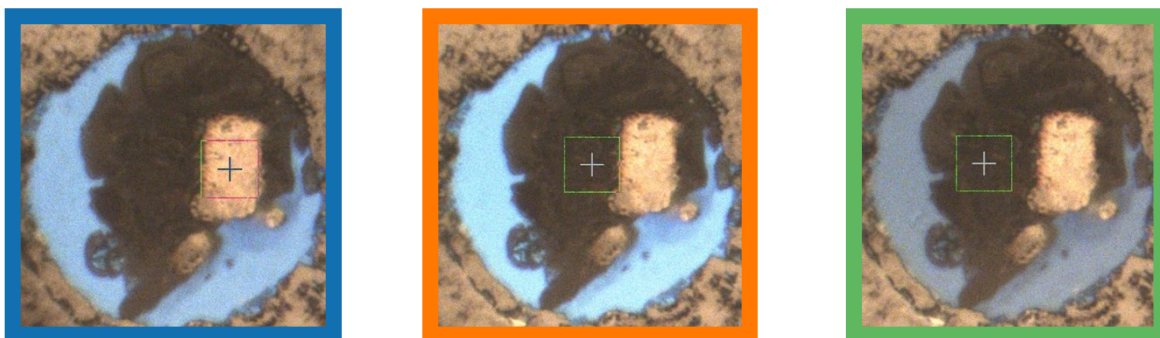

**Figure S9.** Raman spectra of the Sample #1 re-heated at  $\sim 14$  GPa. heated area is highlighted in the inset of the upper figure. Raman spectra collection areas are marked by a cross on the microscopic images. The colors of the microscopic picture borders correspond to the colors of the Raman spectra. In the middle of the heated area (blue spectrum) there is a strong peak at  $\sim 1960 \text{ cm}^{-1}$ , which gradually disappears when the data collection spot is moving out from the heated area (green spectrum).

#### References:

- [1] M. I. Erements, M. Y. Popov, et al., *J. Chem. Phys.* **120**, 10618 (2004) DOI:10.1063/1.1718250.
- [2] B. A. Steele and I. I. Oleynik, *Chem. Phys. Lett.* **643**, 21 (2016) DOI:10.1016/j.cplett.2015.11.008.
